# Supplementary material for: The unusual volume phase transition behavior of the poly(N-isopropylacrylamide)–poly(2-hydroxyethyl methacrylate) interpenetrating polymer network microgel: different roles in different stages
Source: Royal Society of Chemistry journal article supplement (doi:10.1039/c4py00653d), 2014-06-19
Supplement: c4py00653d1.pdf [file c4py00653d1.pdf]

## Supporting Information For

# On the Unusual Volume Phase Transition Behavior of Poly(N-isopropylacrylamide) - Poly(2-hydroxyethyl methacrylate) Interpenetrating Polymer Network Microgel: Different Roles in Different Stages

Bo Zhang, Hui Tang, Peiyi Wu\*

Stat Key Laboratory of Molecular Engineering of Polymers, Department of  
Macromolecular Science, and Laboratory of Advanced Materials, Fudan University,  
Shanghai, 200433, China

Table S1. operation details of the sequence order determination during heating process

|      |      |      |      |      |      |      |      |      |      |      |      |   |
|------|------|------|------|------|------|------|------|------|------|------|------|---|
| 1600 | -    | -    | -    | -    | -    | -    | -    | -    | +    | -    | -    | - |
| 1625 | -    | +    | +    | -    | -    | -    | -    | -    | +    | +    | +    |   |
| 1645 | -    | -    | +    | -    | -    | -    | -    | -    | +    | -    |      |   |
| 1652 | -    | +    | +    | -    | -    | -    | -    | -    | +    |      |      |   |
| 1699 | -    | -    | -    | -    | -    | -    | -    | -    |      |      |      |   |
| 1716 | +    | +    | +    | +    | +    | +    |      |      |      |      |      |   |
| 1733 | -    | +    | +    | +    | -    |      |      |      |      |      |      |   |
| 2871 | -    | +    | +    | +    |      |      |      |      |      |      |      |   |
| 2925 | -    | +    | +    |      |      |      |      |      |      |      |      |   |
| 2946 | -    | -    |      |      |      |      |      |      |      |      |      |   |
| 2971 | -    |      |      |      |      |      |      |      |      |      |      |   |
|      | 2985 | 2971 | 2946 | 2925 | 2871 | 1733 | 1716 | 1699 | 1652 | 1645 | 1625 |   |

Table S2 operation details of the sequence order determination during cooling process

|      |      |      |      |      |      |      |      |      |      |      |      |      |      |
|------|------|------|------|------|------|------|------|------|------|------|------|------|------|
| 1600 | -    | -    | -    | -    | -    | -    | -    | -    | -    | +    | -    | -    | -    |
| 1625 | +    | -    | -    | -    | -    | -    | -    | +    | -    | +    | +    | +    |      |
| 1645 | -    | -    | -    | -    | -    | -    | -    | +    | -    | +    | +    |      |      |
| 1656 | -    | -    | -    | -    | -    | -    | -    | +    | -    | +    |      |      |      |
| 1699 | -    | -    | -    | -    | -    | -    | -    | -    | -    |      |      |      |      |
| 1716 | +    | +    | -    | -    | +    | -    | +    | +    |      |      |      |      |      |
| 1733 | -    | -    | -    | -    | -    | -    | -    |      |      |      |      |      |      |
| 2871 | +    | +    | -    | -    | -    | -    |      |      |      |      |      |      |      |
| 2883 | +    | +    | -    | +    | +    |      |      |      |      |      |      |      |      |
| 2925 | +    | +    | -    | -    |      |      |      |      |      |      |      |      |      |
| 2935 | +    | +    | -    |      |      |      |      |      |      |      |      |      |      |
| 2946 | +    | +    |      |      |      |      |      |      |      |      |      |      |      |
| 2967 | +    |      |      |      |      |      |      |      |      |      |      |      |      |
|      | 2985 | 2967 | 2946 | 2935 | 2925 | 2883 | 2871 | 1733 | 1716 | 1699 | 1658 | 1645 | 1625 |
